# Supplementary material for: Gut microbial carbohydrate metabolism contributes to insulin resistance
Source: PubMed Central journal article supplement (PMC10499599; doi:10.1038/s41586-023-06466-x), 2023-08-30
Supplement: 41586_2023_6466_MOESM1_ESM.pdf [file 41586_2023_6466_MOESM1_ESM.pdf]

**Supplementary information**

---

**Gut microbial carbohydrate metabolism contributes to insulin resistance**

---

In the format provided by the authors and unedited

**a**

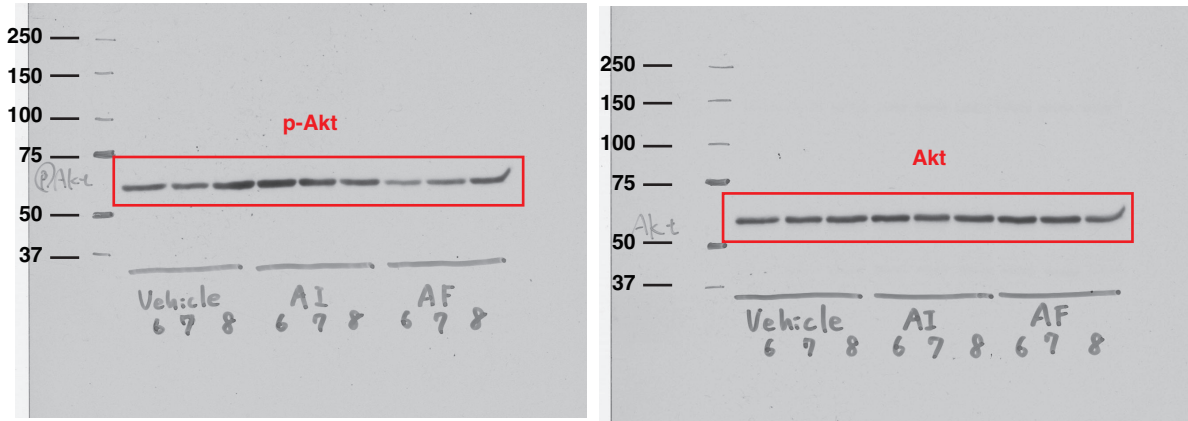

**b**

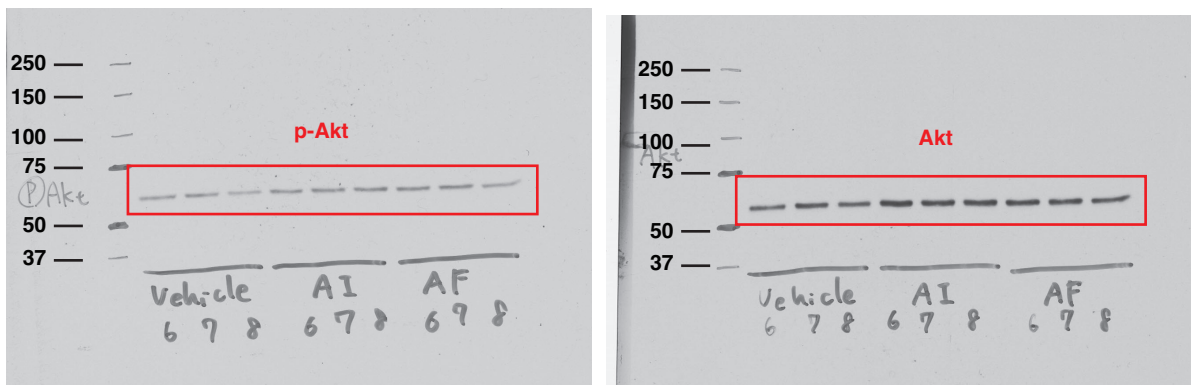

**Supplementary Fig. 1. Raw images of blotting membranes. a, b,** The blotting membranes images of phosphorylated (p-Akt) and total Akt in the liver (**a**) and epididymal fat (**b**). Molecular weight (kDa) is shown on the left. Relating to Extended Data Fig. 9k.
